# Supplementary material for: The PlaceMarker Survey: A Place-Based Tool for Supporting the Monitoring and Appraisal of River-Related Projects and Natural Capital Assessments
Source: MDPI journal article supplement (doi:10.3390/w14162514), 2022-08-15
Supplement: s1 [file s1]

Archive with 3 entries (3 files):
- Supplementary Information 1 PlaceMarker Survey Technical Manual.pdf
- Supplementary Information 2 PlaceMarker Classifications and Indices.pdf
- Supplementary Information 3 PlaceMarker Survey Case Studies.pdf
